## Correction

# Correction: Multi-Level Interactions between the Nuclear Receptor TR $\alpha$ 1 and the WNT Effectors $\beta$ -Catenin/Tcf4 in the Intestinal Epithelium

## The PLOS ONE Staff

In sub-table S1A of Table S1, the nucleotide sequence of Tcf712 (Tcf4) should read: “F: CACAGCTCAAAGCATCAGGA R: CTGCATGTGAAGCTGTCGTT.” The length of the amplicon should be indicated as: “242bp.”

## Reference

1. Sirakov M, Skah S, Lone IN, Nadjar J, Angelov D, et al. (2012) Multi-Level Interactions between the Nuclear Receptor TR $\alpha$ 1 and the WNT Effectors  $\beta$ -Catenin/Tcf4 in the Intestinal Epithelium. PLoS ONE 7(4): e34162. doi:10.1371/journal.pone.0034162

---

**Citation:** The PLOS ONE Staff (2014) Correction: Multi-Level Interactions between the Nuclear Receptor TR $\alpha$ 1 and the WNT Effectors  $\beta$ -Catenin/Tcf4 in the Intestinal Epithelium. PLoS ONE 9(3): e93418. doi:10.1371/journal.pone.0093418

**Published:** March 20, 2014

**Copyright:** © 2014 The PLOS ONE Staff. This is an open-access article distributed under the terms of the Creative Commons Attribution License, which permits unrestricted use, distribution, and reproduction in any medium, provided the original author and source are credited.
